# Supplementary material
Source: Research Square preprint supplement (doi:10.21203/rs.3.rs-8168623/v1)
Supplement: Supplementary file 1 [file 8290fe37da0f2745bf1fdea2.docx]

| **Concept** | **Text Words** | **Controlled Vocabulary (MeSH)** |
| --- | --- | --- |
| **Population** | “Down syndrome”, “Trisomy 21”, “individuals with Down syndrome”, “children with Down syndrome”, “adults with Down syndrome” | “Down Syndrome” |
| **Condition / Context** | “brain tumor”, “brain neoplasm”, “intracranial tumor”, “CNS tumor”, “central nervous system neoplasm”, “pediatric brain tumor”, “malignant brain tumor”, “benign brain tumor” | “Brain Neoplasms”, “Central Nervous System Neoplasms” |
| **Histological Types** | “glioma”, “astrocytoma”, “glioblastoma”, “xanthoastrocytoma”, “ependymoma”, “medulloblastoma”, “germinoma”, “teratoma”, “yolk sac tumor”, “germ cell tumor”, “embryonal carcinoma”, “lymphoma”, “ATRT”, “meningioma”, “choroid plexus papilloma” | “Astrocytoma”, “Glioblastoma”, “Ependymoma”, “Medulloblastoma”, “Germinoma”, “Germ Cell and Embryonal Neoplasms”, “Lymphoma, CNS”, “Meningioma”, “Choroid Plexus Neoplasms” |
| **Outcomes** | “survival”, “prognosis”, “mortality”, “treatment outcome”, “progression-free survival”, “overall survival”, “clinical outcome”, “response to therapy” | “Survival Rate”, “Prognosis”, “Treatment Outcome”, “Disease Progression”, “Mortality” |
| **Boolean Operators** | "AND", "OR", "NOT" | Used to combine the above concepts |

**Mesh Terms**

**Supplementary Tables of the included studies**

| Author/Year | Age | Sex | Clinical profile | Presenting Symptoms | Imaging Characteristics | Tumor Location | Histological Features & Grade | Genetic/Molecular Findings | Associated Conditions |
| --- | --- | --- | --- | --- | --- | --- | --- | --- | --- |
| Fujita et al., 1992 (9) | 9 Years | M | NR | Left hemiparesis | Initial CT: No abnormalities 10-month CT: Small cystic lesion (3×4 mm) in right internal capsule genu  18-month CT: Markedly enhancing mass (35×40 mm) in right basal ganglia Angiography: Poor filling of the right lenticulostriate artery | Right Basal ganglia | Germinoma | NR | NR |
| Zagzag et al., 1992 (10) | 13 Years | M | History of acute myeloblastic leukemia (diagnosed age 3), growth retardation, esophageal stricture, recurrent infections | Ataxia, right hemiparesis | MRI: Intrinsic brainstem mass involving left upper medulla/lower pons | Brainstem | Glioblastoma, WHO grade IV | NR | NR |
| Hori et al., 1992 (11) | 24 Years | M | Congenital heart defects, orthostatic hypotension, recurrent infections, bladder diverticulum, urethral stenosis | Seizures with consequent restlessness | CT: Two cystic lesions (1.5 cm) in right medial hemisphere, edema, midline shift, basal ganglia calcification | Right lateral ventricle | Choroid plexus papilloma, WHO grade I | NR | NR |
| Hashimoto et al., 1995 (12) | 17 Years | M | NR | Left hemiparesis | Contrast CT: Inhomogeneous mass in right basal ganglia | Right Basal ganglia | Germinoma | NR | NR |
| Tanabe et al., 1997 (13) | 10 years | M | Intellectual disability, short stature (< -2SD) | Right leg weakness → progressed to right hemiparesis | CT: Large cystic lesion in left basal ganglia | Left basal ganglia | Germinoma | NR | NR |
| Nakashima et al., 1997 (14) | 12 years | M | NR | Slowly progressive left hemiparesis | Initial MRI (1992): 0.8×1.0 cm mass, mixed intensity (right frontal paraventricular white matter) Follow-up MRI (1993): 2.1×2.5 cm mass; T1-Gd: round enhancing mass; T2: mixed signal intensity with edema | Right Basal ganglia | Germinoma with syncytiotrophoblastic cells | NR | NR |
| Robson et al., 1997 (15) | Neonate | F | Persistent strabismus, diffuse hypotonia | Prenatal: Pineal mass on ultrasound; Postnatal: Strabismus, hypotonia | Prenatal US: Pineal mass MRI: - T1: Homogeneous mass with fat-containing tubular projection into the third ventricle (fat suppression confirmed) - Post-contrast: Margin enhancement US: Heterogeneous, no vascular flow | Pineal region with extension into third ventricle | Mature teratoma, WHO grade 0 | NR | NR |
| Matsumura et al., 1998 (16) | 10 years | M | NR | Seizures, progressive left hemiparesis | CT: Cystic mass with calcification (right basal ganglia/thalamus), enhanced cyst wall. MRI: Polycystic mass (T1 low/isointense), wall enhancement. | Right basal ganglia and thalamus | Germinoma | Trisomy 21 (47,XY) | Macroglossia |
|  | 20 years | M | Intellectual disability | Headache, vomiting | CT: Round hyperdense calcified pineal mass, marked enhancement. MRI: Enhancing pineal mass with hydrocephalus. | Pineal region extending to posterior third ventricle | Germinoma | NR | Bilateral papilledema, upward gaze palsy |
| Chik et al., 1999 (17) | 9 year | M | Severe developmental delay | Progressive ataxia (increased support needs, frequent falling) | A computed tomography scan of the brain demonstrated a left basal ganglia tumor of mixed density with calcification | Left basal ganglia | Germinoma | Trisomy 21 (47,XY) | NR |
|  | 3 year | M | Intellectual disability | Acute ataxia and head tilting; broad-based gait | A computed tomography scan of the brain revealed a 4- cm solid enhancing mass in the left cerebellar region. | Left cerebellar region | Yolk sac tumor | Trisomy 21 (47,XY) | NR |
| Satgé et al., 2001 (18) | 19 year | M | Intellectual disability (IQ 48), hypothyroidism (treated) | Increasing headaches (8 months’ duration) | April 1996: Computerized tomography (CT) and magnetic resonance imaging (MRI) revealed a large, noncontrast-enhancing, right frontotemporoinsular tumor  June 1997: A tumoral frontal cyst involving the ventricular right horn with a mural contrast-enhanced area in the straight and olfactory gyri. September 1998: A CT scan again showed a right cystic frontal mass with intratumoral bleeding | right frontotemporoinsular tumor | Glioblastoma, WHO grade IV | Trisomy 21 (47,XY+21); TP53 wild-type | Partial seizures |
| Rickert et al., 2002 (19) | 19 weeks | F | Dysmorphic features (upslanting palpebral fissures, epicanthic folds, hypertelorism, retro-micrognathia, macroglossia, clino-camptodactyly, palmar flexion creases, wide toe spaces) | NR | NR | attached to the medulla oblongata rostrally of the floor of the fourth  ventricle | Ependymoma, WHO grade II | Trisomy 21 (47,XX,+21) | NR |
| Tan et al., 2004 (20) | 22 year | M | Down syndrome, Hashimoto’s thyroiditis, characteristic facies, coarse skin, buccal pigmentation | Headache (1 month) with nausea, vomiting, lower limb weakness | Computer  tomography of the brain showed a large pituitary–pineal axis  mass, with homogeneous enhancement and focal calcification, compressing the back of the third ventricle and the  aqueduct and causing hydrocephalus. a subsequent magnetic resonance imaging scan delineated two solid enhancing masses. The larger mass, measuring 4 63.7 63.6 cm, was centred in the pineal region and the smaller mass, measuring 1.8 cm in maximum diameter, was present in the pituitary infundibular/suprasellar region | pineal region | Yolksac tumor | NR | Hypopituitarism, diabetes insipidus |
| Murphy et al., 2006 (21) | 18-month | M | Down syndrome; maternal amoxycillin use at 16 weeks, polyhydramnios at 24 weeks; hepatomegaly, macrocephaly (OFHC 42 cm, >98th centile) at birth | Occipitoparietal mass, irritability, hypotonia | Magnetic resonance imaging of the brain  demonstrated a huge fluid-filled interhemispheric cyst  causing expansion of the skull vault and communicating  with dilated third and lateral ventricles | left posterior dorsal interhemisphere | Interhemispheric cyst (type 2c) | Trisomy 21 (47,XY,+21) | Hydrocephalus, corpus callosum agenesis, gray matter heterotopia |
| Benesch et al., 2009 (22) | 4.75 years | M | Down syndrome (free trisomy 21), ventricular septal defect, atrial septal defect II | Generalized weakness, gait disturbances, ataxia, bilateral papilledema | Magnetic resonance  imaging of the brain disclosed a 6 cm 5 cm 4 cm mixed  solid-cystic lesion in the vermis of the fourth ventricle and  cerebellopontine angle with intensive contrast enhancement. Solid-metastatic lesions were found in the lumbar spine  at the level of L2 and in the recessus infundibularis. | in the vermis of the fourth ventricle and  cerebellopontine angle | Medulloblastoma, metastatic | Trisomy 21 | Hypothyroidism, ataxia, left hemiparesis, facial palsy |
| Nakamura et al., 2011 (23) | 11 year | M | Down syndrome | NR | N/A | Basal Ganglia | Teratoma (mixed germ cell tumor) | Trisomy 21 | NR |
| Maeda et al., 2011 (24) | 13 year | M | Down syndrome | Progressive left hemiparesis (1 month) | Admission MR imaging revealed a 50 × 45 × 30–mm tumor in the right basal ganglia. The tumor included cystic components that gave a heterogeneous signal on Gd-enhanced T1-weighted images | right basal ganglia. | Yolk sac tumor, intracranial | Trisomy 21 | NR |
| Bakhtiar et al., 2012 (25) | 2-month | M | Down syndrome (full-term infant, no perinatal complications) | Rapid macrocephaly, lethargy, congenital nystagmus | Computed tomography (CT) of the brain showed a large heterogeneously dense midline posterior fossa tumor, 5 cm in diameter, involving the cerebellum. Small speckles of calcification were also seen. Severe hydrocephalus with periventricular lucency was present. The tumor was of mixed intensity on T1- and T2-weighted magnetic resonance images (MRI) and consisted of various sized cysts. The tumor strongly enhanced with gadolinium and was multiloculated | posterior fossa | Teratoma | Trisomy 21; MIB-1 index: 10% | Lethargy, congenital nystagmus |
| Sugimoto et al., 2013 (26) | 17-year | F | Down syndrome, history of left hemiparesis | Left hemiparesis | Initial computed tomography (CT) of the brain showed faint calcification in the bilateral basal ganglia. MRI showed an ill-defined abnormal signal intensity with partial enhancement in the bilateral basal ganglia and atrophy of the right cerebral peduncle  Later, MRI showed a huge heterogeneous enhanced mass of 5 cm diameter with perifocal edema in the right basal ganglia and an enhanced mass lesion in the pineal region | right basal ganglia | Yolk sac tumor | Trisomy 21 | NR |
| Endo et al., 2013 (27) | 2.5 year | M | Down syndrome (newborn diagnosis) | Vomiting, severe truncal ataxia | Magnetic resonance (MR) images demonstrated a  mass measuring 40×26 mm in the right posterior fossa. T2 weighted image revealed a mass with high  intensity, a cerebrospinal fluid cleft and marked perifocal edema that resulted in tonsillar herniation and  obstructive hydrocephalus. Postcontrast 3-dimensional magnetization prepared rapid gradient echo  imaging (MPRAGE) depicted an enhancing mass with wide attachment to the thickened posterior fossa  dura. Constructive interference in steady state (CISS) images clearly showed that the mass  compressed and displaced cerebellar cortex. Spinal MR images showed no mass or dissemination. | right posterior fossa | Yolk sac tumor, intracranial | Trisomy 21; Olig2/NeuN/CD30/OCT3/4-negative | Obstructive hydrocephalus |
| Yamamoto et al., 2015 (28) | 8-year | M | Down syndrome (no personal/family malignancy history) | Progressive dysphagia, right hemiparesis | Magnetic resonance imaging  showed a mass lesion measuring 50 mm  in maximum diameter in the left cerebellopontine angle. T1-weighted magnetic resonance imaging  with gadolinium-diethylenetriamine pentaacetic acid showed contrast enhancement  with the dural tail sign | posterior fossa | Meningioma | Trisomy 21; chromosome 22q (NF2) deletion (86%) | Obstructive hydrocephalus |
| Judd et al., 2025 (29) | 25-year | F | NR | Nausea, vomiting, dysphagia, facial palsy | MRI: Avidly enhancing left cerebellopontine angle mass (2.6×3.3×2.4 cm) with vasogenic edema; intracanalicular extension to internal auditory canal | Left cerebellopontine angle with extension to internal auditory canal | Atypical teratoid/rhabdoid tumor, WHO grade IV | Trisomy 21; SMARCB1 mutation; MYC subclass | NR |
| Pant et al., 2019 (30) | 27-year | M | Down syndrome (Trisomy 21, 47, XY, +G) | Headache, vomiting (15-20 days), progressive left hemiparesis | Magnetic Resonance Imaging (MRI) revealed a well-defined, large, rounded mass in the right parietotemporal lobe. The mass showed thick irregular enhancing margins, central necrosis and moderate perilesional edema effacing the overlying sulci and right Sylvian fissure. There was a midline shift to the left showing compression of the right lateral ventricle | right parietotemporal lobe | Glioblastoma, WHO grade IV | Trisomy 21; GFAP/EGFR-positive | Mild left hemiparesis |
| Vanderschelden et al., 2022 (31) | 35-year | M | Down syndrome (no personal malignancy; family history of colon/skin cancer) | Seizures; preceded by months of headaches, nausea | Magnetic resonance imaging demonstrated an extra-axial peripherally enhancing lesion measuring 26 mm in maximum diameter in the left cerebellopontine angle. There was adjacent edema and mild mass effect in the left cerebellum, with no evidence of hydrocephalus or midline shift | in the left cerebellopontine angle | Meningioma, atypical, WHO grade 2 | Trisomy 21 (FISH: 95% trisomy) | Generalized seizures |
| Adams et al., 2021 (32) | 12-year | M | Down syndrome, myeloproliferative disorder, autism spectrum disorder | New-onset seizures | MRI revealed a mixed solid  and cystic 13mm mass with surrounding vasogenic  oedema immediately lateral to the posterior horn  of the left lateral ventricle in the periatrial white  matter. The mass lesion was similar in  appearance to the adjacent choroid plexus cyst  and demonstrated contrast enhancement without  reduced diffusivity | lateral to the posterior horn  of the left lateral ventricle in the periatrial white  matter | Glioma, low-grade, WHO grade I | Trisomy 21; KRAS/PMS2 mutations | New-onset seizures |
| Mangum et al., 2016 (33) | 21-month | M | Down syndrome, macrocephaly, frontal bossing, prominent forehead veins | Hypotonia, decreased appetite, right hemiparesis, abnormal posturing | a non-contrast brain CT scan revealed a large right cerebellar hemispheric mass with associated ventriculomegaly of the lateral and third ventricles, follow-up magnetic resonance imaging with and without contrast showed a 4.7 × 6.5 × 5.7 cm heterogeneously enhancing, right cerebellar mass obstructing the fourth ventricle and compressing the lower brain stem with evident cerebellar tonsil herniation | right cerebellar hemispheric mass | Medulloblastoma, desmoplastic/nodular | Trisomy 21; SHH subgroup; PTCH1 germline mutation | Hydrocephalus, cerebellar tonsillar herniation |
| Abu et al., 2018 (34) | 17-year | F | Down syndrome, severe developmental delay, autism | Fatigue, headache, right eye ptosis, ophthalmoplegia (1 week) | brain magnetic resonance imaging (MRI) with and without  contrast revealed a large enhancing suprasellar mass that appeared to involve the pituitary gland | suprasellar mass that appeared to involve the pituitary gland. The suprasellar mass extended to the cavernous sinuses bilaterally with encasement of both carotid arteries | Embryonal carcinoma, intracranial | Trisomy 21; CD30+/pancytokeratin+/OCT4+; Ki-67 >90% | Panhypopituitarism |
| Shibata et al., 2023 (35) | 48-year | M | Down syndrome (no prior complications) | Gait disturbance (unable to walk for 2 months) | Cranial computed tomography (CT) scanning at the referring hospital revealed that the tumors, which were accompanied by marked edema, were located in both  hemispheres and had spread symmetrically across the corpus callosum. Brain magnetic resonance imaging (MRI) showed tumor isointensity on T1-weighted images, moderate hyperintensity on T2-weighted images,  and hyperintensity on diffusion-weighted images. The tumors were distributed along the ventricular wall and  were uniformly enhanced by gadolinium | both hemispheres and had spread symmetrically across the  corpus callosum. | CNS lymphoma (DLBCL) | Trisomy 21; CD20+/BCL6+/MUM1+ | NR |
| Chan et al., 2021 (36) | 3-year | M | Down syndrome (unremarkable history) | Progressive left hemiparesis (2 weeks) | Initial imaging demonstrated an 8-cm right temporalparietal minimally enhancing mass with significant midline shift  and hemorrhage | Right temporalparietal cortex | Ependymoma, anaplastic, WHO grade III | Trisomy 21; C11orf95-RELA fusion | NR |
| Daniel et al., 2003 (37) | 19 year | M | Down syndrome | NR | NR | Brain | Astrocytoma | Trisomy 21 | Hypothyroidism |
| Habib et al., 2022 (38) | 1-year | M | Down syndrome (karyotype-confirmed Trisomy 21) | Gradual macrocephaly, developmental regression | a computed tomography (CT) scan was performed, which showed a large cystic tumor in the right parieto temporo occipital regions. Subsequent magnetic resonance imaging (MRI) of the brain with contrast showed a 10.9 × 11.4 × 8.9 cm, heterogeneously enhancing, mixed solid and cystic supratentorial mass, with surrounding vasogenic edema in the right parieto temporo occipital lobe. The solid component was dural based, measuring 6.4 × 6.0 cm, showing heterogeneous intensity on T2W imaging with marked enhancement on post-contrast images. | posteriorly in the right parieto temporo occipital region | Astrocytoma, high-grade desmoplastic | Trisomy 21; GFAP-positive; high Ki-67 | Macrocephaly, hypotonia, hyperreflexia |
| Boni et al., 2021 (3) | 10-year | M | Down syndrome, congenital hypothyroidism, intellectual disability, bilateral hearing loss | Vomiting, fatigue, headache, progressive ataxia (2 weeks) | computed tomography (CT) showed a hyperdense mass in the fourth ventricle with obstructive hydrocephalus. MRI confirmed the presence of the heterogeneous intraventricular tumor with small hyperintense cystic components, heterogeneous contrast-enhancement, and reduced diffusion, suspicious for MB without cerebral and spinal metastases. The lesion’s high density on the CT study and the reduced diffusion on MRI indicated high cellular density and nuclear area. | fourth ventricle | Medulloblastoma, WNT subgroup | Trisomy 21; CTNNB1 mutation; TP53 variant; DUOX2 mutations | NR |
| Bora et al., 2016 (2) | 29 year | M | Down syndrome (scheduled for craniotomy) | Headache, vomiting (15 days), mild left hemiparesis | Contrast enhanced magnetic resonance imaging (MRI) study revealed solid cystic intraaxial mass lesion in right parietal lobe with perilesional oedema with  foci of calcification, haemorrhage with enhancement characteristics. | right parietal lobe | Glioblastoma, WHO grade IV | Trisomy 21 (47,XY,+21) | Macroglossia, high-arched palate |
| Yang et al., 2017 (39) | 8-year | M | Down syndrome (preterm birth, PDA surgery at age 7, growth restriction) | Gait disturbance, fatigue | Brain MRI revealed a neuroglial cyst approximately 1 cm in diameter in the left cerebellar vermis adjacent to the fourth ventricle. | in the left cerebellar vermis adjacent to the fourth ventricle. | Neuroglial cyst | Trisomy 21 (47,XY,+21) | None |
| Sabellano et al., 2023 (40) | 24 year old | M | Developmental delay, Down syndrome | Holocranial headache (6 months, nocturnal), intermittent eye deviation, diplopia, altered sleep | Cranial MRI with contrast showed a  heterogeneously enhancing mass centered in the  pineal gland with consideration of a germinoma,  and obstructive hydrocephalus | centered in the  pineal gland | Germinoma | Not tested | Papilledema, conductive hearing loss, Parinaud syndrome |
| Baroni et al., 2022 (41) | 13- Years | F | NR | Ataxia, vomiting (3 weeks) | Brain MRI: Right cerebellar hemispheric mass with mass effect and hydrocephalus, no spinal metastasis (MRI and lumbar CSF negative for dissemination) | Right cerebellar hemisphere | Medulloblastoma, desmoplastic/nodular | NR | NR |
| Ferraz et al., 2013 (42) | 6-month-old | M | Non-Down syndrome infant | Left auricular appendix | A brain CT scan and  MRI showed a very heterogeneous mass in the posterior  fossa with significant post-gadolinium enhancement, consistent with a teratoma | posterior  fossa | Teratoma | Trisomy 21 (mosaic: 47,XY,+21[6]/46,XY[6]) | None |
| Miyake et al., 2017 (43) | 18- years | M | Down syndrome | Left facial palsy, hearing loss; later right facial palsy, bilateral ptosis | . Brain and spine magnetic resonance imaging  (MRI) demonstrated multiple tumors at the bilateral ventral midbrain, bilateral  cerebellopontine angles, pineal body, and  spinal canal of lumbosacral regions | bilateral ventral midbrain, bilateral  cerebellopontine angles, pineal body, and  spinal canal of lumbosacral regions | Germinoma | Trisomy 21; PLAP+/c-Kit+/OCT4+/SALL4+/HCG+ | Oculomotor palsy, bilateral facial palsy, hearing loss |
| Nodomi et al., 2017 (44) | 14-years | M | Down syndrome | Progressive left hemiparesis (1 year) | Cranial MRI revealed a slight gadolinium-enhanced area in the bilateral basal ganglia | bilateral  basal ganglia | Germinoma, CNS | Trisomy 21; OCT3/4+/SALL4+ | Progressive left hemiparesis |
| Petruzzellis et al., 2019 (45) | 8 years | M | Down syndrome, asymmetrical gait, early puberty (Tanner P2G2) | Progressive gait impairment, early puberty signs | brain imaging showed diffused pathological tissue, extending from the left diencephalic region and involving the cerebral peduncle caudally, the basal ganglia region cranially (globus pallidus, putamen and posterior arm of the internal capsule), the outer capsule laterally, the temporo-mesial cortex and subcortical white matter, which extended deeply to the anterior portion of the temporal lobe, to the optic chiasm and bilateral retrochiasmatic tract | extending from the left diencephalic region and involving the cerebral peduncle caudally, the basal ganglia region cranially (globus pallidus, putamen and posterior arm of the internal capsule), the outer capsule laterally, the temporo-mesial cortex and subcortical white matter, which extended deeply to the anterior portion of the temporal lobe, to the optic chiasm and bilateral retrochiasmatic tract | Pleomorphic xanthoastrocytoma, WHO grade II | Trisomy 21; BRAF V600E mutation | Central precocious puberty |

| Author/Year | Surgery | Surgery Resection Extent | Radiation/Chemotherapy | Follow-Up (months) | Outcome | Tumor Recurrence | Functional status | Cause of Death |
| --- | --- | --- | --- | --- | --- | --- | --- | --- |
| Fujita et al., 1992 (9) | Craniotomy | Gross Total Resection | Post-operation Radiotherapy | NR | Remission | None | NR | Alive |
| Zagzag et al., 1992 (10) | None (Corticosteroids) | None | Prior (age 3): Cranial irradiation (18 Gy) Chemotherapy (cytarabine, doxorubicin, thioguanine, methotrexate) For glioma: Corticosteroids only | 14 month | Death | NR | Progressive decline: non-ambulatory → dysphagia → coma | Pneumonia |
| Hori et al., 1992 (11) | NR | NR | NR | 0.3 months | Death | NR | Progressive decline: agitation → seizures → somnolence → dystonia | Increased intracranial pressure |
| Hashimoto et al., 1995 (12) | Craniotomy | Subtotal Resection | Radiotherapy: 40 Gy whole brain + 26 Gy spinal cord | >60 months | Remission | None | NR | Alive |
| Tanabe et al., 1997 (13) | Craniotomy | Partial Resection | Chemo: Cisplatin + etoposide Radiation: Local field (30 Gy) | NR | Good | NR | Residual right hemiparesis | Alive |
| Nakashima et al., 1997 (14) | Frontal cortical incision on the right side | Gross Total Resection | Radiation: Whole-brain irradiation (21 Gy; interrupted), later craniospinal irradiation (22.5 Gy brain/25.8 Gy spine) Chemotherapy: Cisplatin + etoposide (6 courses) | 14 months | Death | Yes (spinal metastasis during radiation, rising HCG despite therapy) | Progressive left hemiparesis | Pneumonia |
| Robson et al., 1997 (15) | Right paramedian craniotomy | Gross Total Resection | None | NR | Alive | NR | NR | Alive |
| Matsumura et al., 1998 (16) | Right frontotemporal craniotomy | Partial Resection | None | 0.5 months | Death | NR | Postoperative upper respiratory tract obstruction | Acute cardiopulmonary failure |
|  | Right occipital transtentorial approach | Partial Resection | Chemo: Carboplatin + etoposide Radiation: Local (40 Gy total) | NR | Remission | None | Stable | Alive |
| Chik et al., 1999 (17) | Tumor debulking surgery (Two-thirds of the tumor resected) | Subtotal Resection | Chemo: cisplatin 100 mg/m² on day 1, etoposide 120 mg/m² on day 1-3, and bleomycin 15 mg/m² on day 2 at four weekly intervals | NR | Death | NR | Bedridden | Sepsis (secondary to myelosuppression) |
|  | Radical debulking surgery | NR | Chemo: cisplatin 100 mg/m² on day 1, etoposide 120 mg/m² on day 1-3, and bleomycin 15 mg/m² on day 2 at four weekly intervals | 36 months | Alive | No | Stable | Alive |
| Satgé et al., 2001 (18) | April 1996, frontotemporal craniotomy and resection of tumor June 1997, resection of tumor May 1998, a right frontal craniotomy with resection of tumor | Partial Resection (1996, 1997) Extent not mentioned (1998) | Radiotherapy: 60 grays (large, right supratentorial volume) ended Sept 1997 Chemotherapy: 300 mg carmustine (BCNU) between June-Aug 1998 | 32 months | Death | 11 months after initial surgery, an MRI indicated a tumor recurrence. | Coma | Intracranial hypertension |
| Rickert et al., 2002 (19) | NR | NR | NR | NR | NR | NR | NR | Pregnancy termination |
| Tan et al., 2004 (20) | stereotactic biopsy | Biopsy | (patient died before planned chemo/radiotherapy) | 1.5 months | Death | No | NR | Fever of unknown origin |
| Murphy et al., 2006 (21) | ventriuloperitoneal shunt was inserted | NR | No | 16 months | Alive | No | Stable growth/development (Down syndrome) | Not applicable (alive) |
| Benesch et al., 2009 (22) | NR | NR | Chemotherapy: cyclophosphamide [800 mg/m²/day] days 1–3, high-dose methotrexate [5 g/m²/day] with leukovorin rescue days 15/29, vincristine [1.5 mg/m²/day] days 1/15/29, carboplatin [200 mg/m²/day], etoposide [150 mg/m²/day] days 43–45 + maintenance therapy Radiotherapy: Craniospinal axis (35.2 Gy) + boosts (55 Gy posterior fossa, 49.6 Gy metastases) | 24 months and 60 months | Remission | NR | Residual ataxia, mild left hemiparesis, facial palsy | NR |
| Nakamura et al., 2011 (23) | yes, biopsy and resection | Biopsy and Gross Total Resection | Chemo: ICE (ifosfamide, cisplatin, etoposide) Radiotherapy: Whole brain (50/24 Gy) 13 days post-chemo | 60 months | Death | 3.7 years after the initial treatment the tumor recurred and was revealed as a gadolinium-enhanced lesion at the bilateral anterior horn of the lateral ventricles | NR | Myelosuppression (chemotherapy-induced) |
| Maeda et al., 2011 (24) | NR | NR | Chemotherapy: ICE regimen (ifosfamide 900 mg/m²; cisplatin 25 mg/m²; etoposide 60 mg/m²) Radiotherapy: Whole brain (30 Gy) + ventricle (20 Gy) + spine (24 Gy) | 21 months | Alive | No tumor recurrence | NR | NR |
| Bakhtiar et al., 2012 (25) | Midline suboccipital craniotomy Resection | Gross Total Resection | Chemotherapy: Four cycles of cisplatin + etoposide | 10 months and 36 months followup | Alive | two recurrent lesions were detected in the cerebellar vermis and tentorium on MRI, performed 10 months after the first surgery.  latest MRI studied 3 years after the  second surgery showed no recurrences. | Requires minimal assistance | NR |
| Sugimoto et al., 2013 (26) | Biopsy | Biopsy | Chemotherapy: ICE (ifosfamide 900 mg/m², cisplatin 25 mg/m², etoposide 60 mg/m²) with radiotherapy | 5 months | Alive | No | Moderate left hemiparesis | NR |
| Endo et al., 2013 (27) | Emergent removal surgery via the lateral suboccipital route | Gross Total Resection | Chemotherapy: VBP (VP16 120 mg/m² days 1–3, bleomycin 15 mg/m² day 2, CDDP 20 mg/m² days 1–5) + BEP post-recurrence Radiotherapy: 54 Gy/30 fr post-recurrence | 5 months initially after surgery and 18 months followup | Alive | Five months after surgery, MR images confirmed small local recurrence.  No tumor recurrence on follow up MR imaging in 1 and a half years. | NR | NR |
| Yamamoto et al., 2015 (28) | resection via left lateral suboccipital approach | Partial Resection | NR | 24 months | Alive | No | Neurologic improvement | NR |
| Judd et al., 2025 (29) | Initial minimal debulking Second debulking (89% volume reduction) | Subtotal Resection | Radiotherapy: Focal proton beam Chemotherapy: Modified regimen | 22 months | Alive | No | NR | Alive |
| Pant et al., 2019 (30) | cranitomy, decompression and removal | Gross Total Resection | Radiotherapy started, but patient deteriorated despite multimodality approach | NR | Death | No | Progressive deterioration | Progressive deterioration (1 month) |
| Vanderschelden et al., 2022 (31) | Removal using a left retrosigmoid surgical approach, the mass was removed. | Gross Total Resection | Radiotherapy: Adjuvant 54 Gy (due to atypical meningioma recurrence risk) | 42 months | Alive | No | Stable neurologic function | NR |
| Adams et al., 2021 (32) | robotic-guided biopsy and laser ablation | Biopsy | No | 18  months | Alive | No | Seizure-free (on anticonvulsants) | NR |
| Mangum et al., 2016 (33) | -suboccipital craniotomy for tumor resection -A ventriculo-peritoneal shunt was placed to manage  the hydrocephalus and a Broviac catheter was inserted. | Gross Total Resection | Chemotherapy: 3 cycles carboplatin/etoposide → 1 cycle cyclophosphamide/etoposide → marrow-ablative thiotepa/carboplatin + stem cell rescue → brentuximab vedotin | 2 days | Alive | Follow-up  imaging showed an additional nodule distinct from the  original lesion, and this was removed 2 days later | NR | NR |
| Abu et al., 2018 (34) | Yes, resection | Partial Resection | Chemotherapy: 3 cycles of standard CNS GCT induction chemotherapy (2 cycles of carboplatin and etoposide interspersed with 1 cycle of cyclophosphamide and etoposide). She then received 3 cycles of marrow-ablative thiotepa and carboplatin  followed by autologous hematopoietic stem cell rescue. She  subsequently received 6 cycles of intravenous brentuximabvedotin at 1.8 mg/kg at 21- to 28-day intervals | 24 months since diagnosis  14 months since the completion of all therapy | Alive | No | NR | NR |
| Shibata et al., 2023 (35) | biopsy | Biopsy | Chemotherapy: Rituximab, methotrexate, procarbazine, vincristine (started POD3) Radiotherapy: Planned whole-brain post-chemotherapy → cytarabine | 12 days | Alive | No | NR | NR |
| Chan et al., 2021 (36) | right parietal craniotomy for gross total image-complete resection Recurring tumor, a second craniotomy with gross total resection | Gross Total Resection | Radiotherapy: Proton beam therapy | 12 months | Death | 2 recurrences -Three months after discharge from initial surgery, intracranial recurrence -After two resections and proton beam therapy, drop metastases with a non-enhancing small 2–3 mm lesion at the level of L2–L3, as well as multiple areas of leptomeningeal nodularity | NR | NR |
| Daniel et al., 2003 (37) | Yes | NR | Radiotherapy and Chemotherapy | NR | Death | 3 relapses | NR | Tumor relapse |
| Habib et al., 2022 (38) | Craniotomy and excision | Subtotal Resection | N/A (chemotherapy advised at 2-month followup) | 1.5 months (6 weeks) | NR | Yes A 2 months postoperative brain MRI with contrast showed a comparatively enlarged 4.2 × 2.6 × 4.1 cm homogeneously enhancing dural-based residual supratentorial mass along the right occipital location. With recurrence after the initial surgery, the parents were non-consenting for further surgical intervention, and chose chemotherapy in the hope of controlling further tumor growth and halting subsequent functional decline | Functional improvement (sitting with support, hand grip) | NR |
| Boni et al., 2021 (3) | endoscopic third ventriculostomy subsequently, a gross total resection | Gross Total Resection | Combination of surgery, radiotherapy, chemotherapy | 13 months | Death | relapsed with local and metastatic disease 2 months after the end of treatment | NR | Tumor relapse (metastatic) |
| Bora et al., 2016 (2) | Right parietal craniotomy and  intra-tumoral decompression of the tumor | NR | No | 24 hrs | Alive | NR | NR | NR |
| Yang et al., 2017 (39) | discharged after observation, without any specific treatment. | No Resection | Discharged after observation | NR | NR | NR | NR | N/A |
| Sabellano et al., 2023 (40) | external ventricular device (EVD) insertion | No Resection | Chemotherapy: Bleomycin, etoposide, cisplatin Radiotherapy: Referred to oncologist | NR | N/A | NR | NR | N/A |
| Baroni et al., 2022 (41) | Gross total resection performed | Gross Total Resection | Radiotherapy: Reduced-dose craniospinal (12.6 Gy) + posterior fossa boost (41.4 Gy) Chemotherapy: Vincristine (concomitant), cisplatin/cyclophosphamide (adjuvant), temozolomide (maintenance) | NR | Alive | No | Moderate intellectual disability, bilateral hearing loss, hypogonadism | Alive |
| Ferraz et al., 2013 (42) | Initial: total surgical resection Later: radical resection after tumor progression | Gross Total Resection | No | 24 months | Alive | No | No deficits | NR |
| Miyake et al., 2017 (43) | Open  biopsy  performed via occipital transtentorial  approach | Biopsy | Chemotherapy: Carboplatin (450 mg/m² day 1) + etoposide (150 mg/m² days 1-3) ×3 courses Radiotherapy: 23.4 Gy → later 14.4 Gy | 18 months | Alive | No | NR | NR |
| Nodomi et al., 2017 (44) | Stereoscopic biopsy | NR | Chemotherapy: ICE (ifosfamide 900 mg/m² days 1-5; cisplatin 20 mg/m² days 1-5; etoposide 60 mg/m² days 1-5) Radiotherapy: 24 Gy/15 fractions during chemotherapy | 16 months | Alive | No | Residual left hemiparesis | NR |
| Petruzzellis et al., 2019 (45) | Surgical resection | Partial Resection | Chemotherapy: Vemurafenib (BRAF inhibitor; 240 mg/day → 480 mg twice daily) | 38 months | Alive | No | Improved gait/motor function | NR |

**Tables of the Risk of Bias**

**JBI Critical Appraisal Checklist for Case Series**

1. **Were there clear criteria for inclusion in the case series?**
2. **Was the condition measured in a standard, reliable way?**
3. **Were valid methods used for identification of the condition?**
4. **Did the case series have consecutive inclusion of participants?**
5. **Did the case series have complete inclusion of participants?**
6. **Was there clear reporting of participant demographics?**
7. **Was there clear reporting of clinical information?**
8. **Were outcomes/prevalence estimates clearly reported?**
9. **Was there clear reporting of the site(s)/clinic(s) involved?**
10. **Was statistical analysis appropriate?**

| Authors Name/Year | 1 | 2 | 3 | 4 | 5 | 6 | 7 | 8 | 9 | 10 | Overall |
| --- | --- | --- | --- | --- | --- | --- | --- | --- | --- | --- | --- |
| Matsumura et al., 1998 | Yes | Yes | Yes | No | No | Yes | Yes | Yes | Yes | No | 7-High |
| Chik et al., 1999 | Yes | Yes | Yes | Yes | Yes | Yes | Yes | Yes | Yes | No | 9-High |
| Nakamura et al., 2011 | Yes | Yes | Yes | Yes | Yes | Yes | Yes | Yes | Yes | Yes | 10-High |
| Daniel et al., 2003 | Yes | Yes | Yes | Yes | Yes | Yes | Yes | Yes | Yes | No | 9-High |

**JBI Critical Appraisal Checklist for Case Reports**

1. **Were the patient’s demographic characteristics clearly described?**
2. **Was the patient’s history clearly described and presented as a timeline?**
3. **Was the current clinical condition clearly described?**
4. **Were diagnostic tests/assessment methods clearly described?**
5. **Was the intervention/treatment procedure clearly described?**
6. **Was the post-intervention clinical condition clearly described?**
7. **Were adverse events identified and described?**
8. **Does the case report provide takeaway lessons?**

| Authors Name/Year | 1 | 2 | 3 | 4 | 5 | 6 | 7 | 8 | Overall |
| --- | --- | --- | --- | --- | --- | --- | --- | --- | --- |
| Fujita et al., 1992 | Yes | Yes | Yes | Yes | Yes | Yes | Yes | No | 7-High |
| Zagzag et al., 1992 | Yes | Yes | Yes | Yes | Yes | Yes | Yes | Yes | 8-High |
| Hori et al., 1992 | Yes | Yes | Yes | Yes | Yes | No | No | No | 5-Moderate |
| Hashimoto et al., 1995 | Yes | Yes | Yes | Yes | Yes | Yes | Yes | Yes | 8-High |
| Tanabe et al., 1997 | Yes | Yes | Yes | Yes | Yes | Yes | Yes | Yes | 8-High |
| Nakashima et al., 1997 | Yes | Yes | Yes | Yes | Yes | Yes | Yes | No | 7-High |
| Robson et al., 1997 | Yes | Yes | Yes | Yes | Yes | Yes | Yes | Yes | 8-High |
| Satgé et al., 2001 | Yes | Yes | Yes | Yes | Yes | Yes | Yes | Yes | 8-High |
| Rickert et al., 2002 | Yes | Yes | Yes | Yes | Yes | No | No | Yes | 6-Moderate |
| Tan et al., 2004 | Yes | Yes | Yes | Yes | Yes | Yes | Yes | Yes | 8-High |
| Murphy et al., 2006 | Yes | Yes | Yes | Yes | Yes | Yes | Yes | Yes | 8-High |
| Benesch et al., 2009 | Yes | Yes | Yes | Yes | Yes | Yes | Yes | Yes | 8-High |
| Maeda et al., 2011 | Yes | Yes | Yes | Yes | Yes | Yes | Yes | Yes | 8-High |
| Bakhtiar et al., 2012 | Yes | Yes | Yes | Yes | Yes | Yes | Yes | Yes | 8-High |
| Sugimoto et al., 2013 | Yes | Yes | Yes | Yes | Yes | Yes | Yes | Yes | 8-High |
| Endo et al., 2013 | Yes | Yes | Yes | Yes | Yes | Yes | Yes | No | 7-High |
| Yamamoto et al., 2015 | Yes | Yes | Yes | Yes | Yes | Yes | Yes | Yes | 8-High |
| Judd et al., 2025 | Yes | Yes | Yes | Yes | Yes | Yes | Yes | Yes | 8-High |
| Pant et al., 2019 | Yes | Yes | Yes | Yes | Yes | Yes | Yes | No | 7-High |
| Vanderschelden et al., 2022 | Yes | Yes | Yes | Yes | Yes | Yes | Yes | No | 7-High |
| Adams et al., 2021 | Yes | Yes | Yes | Yes | Yes | Yes | Yes | Yes | 8-High |
| Mangum et al., 2016 | Yes | Yes | Yes | Yes | Yes | Yes | Yes | Yes | 8-High |
| Abu et al., 2018 | Yes | Yes | Yes | Yes | Yes | Yes | Yes | Yes | 8-High |
| Shibata et al., 2023 | Yes | Yes | Yes | Yes | Yes | Yes | Yes | Yes | 8-High |
| Chan et al., 2021 | Yes | Yes | Yes | Yes | Yes | Yes | Yes | Yes | 8-High |
| Habib et al., 2022 | Yes | Yes | Yes | Yes | Yes | Yes | Yes | Yes | 8-High |
| Boni et al., 2021 | Yes | Yes | Yes | Yes | Yes | Yes | Yes | Yes | 8-High |
| Bora et al., 2016 | Yes | Yes | Yes | Yes | Yes | Yes | Yes | Yes | 8-High |
| Yang et al., 2017 | Yes | Yes | Yes | Yes | No | No | No | No | 4-Low |
| Sabellano et al., 2023 | Yes | Yes | Yes | Yes | Yes | No | No | Yes | 6-Moderate |
| Baroni et al., 2022 | Yes | Yes | Yes | Yes | Yes | Yes | Yes | Yes | 8-High |
| Ferraz et al., 2013 | Yes | Yes | Yes | Yes | Yes | Yes | Yes | Yes | 8-High |
| Miyake et al., 2017 | Yes | Yes | Yes | Yes | Yes | Yes | Yes | Yes | 8-High |
| Nodomi et al., 2017 | Yes | Yes | Yes | Yes | Yes | Yes | Yes | Yes | 8-High |
| Petruzzellis et al., 2019 | Yes | Yes | Yes | Yes | Yes | Yes | Yes | Yes | 8-High |
